# Supplementary material for: NAC Family Transcription Factors in Tobacco and Their Potential Role in Regulating Leaf Senescence
Source: Front Plant Sci. 2018 Dec 21;9:1900. doi: 10.3389/fpls.2018.01900 (PMC6308388; doi:10.3389/fpls.2018.01900)
Supplement: TABLE S3 — Characteristics of NAC gene family in tobacco. [file Table_3.xls]

## Sheet: NtNAC genes
NIPGR ID	PHM_ID	PHM_ID	Length (aa)	NAC and Other Domains	Exon	Intron	Phylogeny Group	Arabidopsis ortholog locus	Arabidopsis locus description	Score	E-value
NtNAC001	mRNA_100722_cds	gene_59612|	238	1-133	2	1	NtNAC-d	AT1G12260.1	ANAC007, VND4	143	1e-34
NtNAC002	mRNA_1020_cds	gene_604|	352	10-162	3	2	NtNAC-f	AT4G27410.2	ANAC072, RD26	362	2e-100
NtNAC003	mRNA_102849_cds	gene_60847|	232	4-169	1	0	NtNAC-o	AT1G77450.1	ANAC032	63.2	1e-10
NtNAC004	mRNA_103435_cds	gene_61208|	250	9-165	3	2	NtNAC-e	AT5G13180.1	ANAC083	268	2e-72
NtNAC005	mRNA_104533_cds	gene_61792|	264	13-127; Transmembrane-240-261	3	2	NtNAC-o	AT5G04410.1	ANAC078, NAC2	115	2e-26
NtNAC006	mRNA_104541_cds	gene_61796|	399	23-179	4	3	NtNAC-i	AT3G10490.2	ANAC052	291	4e-79
NtNAC007	mRNA_104937_cds	gene_62015|	283	4-150	3	2	NtNAC-h	AT2G17040.1	ANAC036	282	1e-76
NtNAC008	mRNA_106372_cds	gene_62865|	342	13-167	3	2	NtNAC-b	AT5G61430.1	ANAC100, ATNAC5	370	1e-102
NtNAC009	mRNA_106655_cds	gene_63039|	301	40-189	1	0	NtNAC-o	AT3G04070.2	ANAC002, ATAF1	69.3	3e-12
NtNAC010	mRNA_106659_cds	gene_63040|	229	9-158	1	0	NtNAC-o	AT2G33480.1	ANAC041	71.6	4e-13
NtNAC011	mRNA_106724_cds	gene_63070|	561	1-104; Transmembrane-535-557	5	4	NtNAC-k	AT3G49530.1	ANAC062	189	5e-48
NtNAC012	mRNA_107149_cds	gene_63325|	394	39-186	3	2	NtNAC-h	AT2G02450.1	ANAC034/035	340	9e-94
NtNAC013	mRNA_108547_cds	gene_64151|	525	2-154	5	4	NtNAC-i	AT5G09330.1	ANAC082	263	2e-70
NtNAC014	mRNA_109962_cds	gene_64988|	257	3-163	3	2	NtNAC-h	AT3G44350.2	ANAC061	250	8e-67
NtNAC015	mRNA_112637_cds	gene_66553|	248	11-165	3	2	NtNAC-e	AT5G13180.1	ANAC083	265	2e-71
NtNAC016	mRNA_113617_cds	gene_67136|	356	5-157	3	2	NtNAC-d	AT1G12260.1	ANAC007, VND4	326	1e-89
NtNAC017	mRNA_115059_cds	gene_68001|	319	21-191	3	2	NtNAC-h	AT2G43000.1	ANAC042	258	4e-69
NtNAC018	mRNA_117381_cds	gene_69364|	296	13-166	3	2	NtNAC-b	AT5G61430.1	ANAC100, ATNAC5	340	5e-94
NtNAC019	mRNA_117702_cds	gene_69530|	331	9-177	3	2	NtNAC-d	AT2G46770.1	ANAC043	330	8e-91
NtNAC020	mRNA_117839_cds	gene_69620|	321	3-151	3	2	NtNAC-a	AT3G18400.1	ANAC058	285	2e-77
NtNAC021	mRNA_117932_cds	gene_69680|	344	3-156	4	3	NtNAC-g	AT5G46590.1	ANAC096	244	7e-65
NtNAC022	mRNA_119050_cds	gene_70336|	347	7-160	3	2	NtNAC-d	AT2G18060.1	ANAC037	422	2e-118
NtNAC023	mRNA_120667_cds	gene_71288|	245	11-173	3	2	NtNAC-e	AT5G13180.1	ANAC083	228	2e-60
NtNAC024	mRNA_120856_cds	gene_71383|	385	9-140	5	4	NtNAC-n	AT1G76420.1	ANAC031	61.2	1e-09
NtNAC025	mRNA_122427_cds	gene_72275|	393	11-174	3	2	NtNAC-d	AT2G46770.1	ANAC043	311	4e-85
NtNAC026	mRNA_122847_cds	gene_72513|	385	12-172	3	2	NtNAC-h	AT1G26870.1	ANAC009	337	7e-93
NtNAC027	mRNA_123035_cds	gene_72630|	612	22-178; Transmembrane-580-601	3	2	NtNAC-i	AT1G34190.1	ANAC017	292	5e-79
NtNAC028	mRNA_124326_cds	gene_73344|	283	8-162	3	2	NtNAC-f	AT1G69490.1	ANAC029, ATNAP, NAP	321	3e-88
NtNAC029	mRNA_125220_cds	gene_73872|	350	9-176	3	2	NtNAC-e	AT3G15510.1	ANAC056, AtNAC2	322	2e-88
NtNAC030	mRNA_125226_cds	gene_73875|	343	8-163	3	2	NtNAC-f	AT4G27410.2	ANAC072, RD26	360	9e-100
NtNAC031	mRNA_125301_cds	gene_73920|	182	6-171	1	0	NtNAC-o	AT5G04410.1	ANAC078, NAC2	49	2e-06
NtNAC032	mRNA_125816_cds	gene_74195|	345	9-140	5	4	NtNAC-n	AT3G18400.1	ANAC058	65.9	4e-11
NtNAC033	mRNA_127337_cds	gene_75069|	264	13-128; Transmembrane-240-261	3	2	NtNAC-o	AT5G04410.1	ANAC078, NAC2	115	4e-26
NtNAC034	mRNA_127338_cds	gene_75070|	184	7-164	3	2	NtNAC-i	AT3G10500.1	ANAC053	244	3e-65
NtNAC035	mRNA_127339_cds	gene_75071|	398	24-178	4	3	NtNAC-i	AT3G10490.2	ANAC052	282	3e-76
NtNAC036	mRNA_128606_cds	gene_75819|	300	4-156	3	2	NtNAC-d	AT1G71930.1	ANAC030, VND7	296	9e-81
NtNAC037	mRNA_130546_cds	gene_76957|	373	40-216	7	6	NtNAC-m	AT3G01600.1	ANAC044	279	2e-75
NtNAC038	mRNA_130945_cds	gene_77177|	279	25-182	4	3	NtNAC-i	AT3G10480.2	ANAC050	292	1e-79
NtNAC039	mRNA_130971_cds	gene_77193|	541	9-161; Transmembrane-517-540	6	5	NtNAC-i	AT5G04410.1	ANAC078, NAC2	384	1e-106
NtNAC040	mRNA_131038_cds	gene_77240|	340	5-159	3	2	NtNAC-d	AT4G10350.1	ANAC070	368	4e-102
NtNAC041	mRNA_131517_cds	gene_77520|	418	1-55	5	4	NtNAC-g	AT1G65910.1	ANAC028	199	2e-51
NtNAC042	mRNA_133374_cds	gene_78555|	523	2-154	5	4	NtNAC-i	AT5G09330.1	ANAC082	263	1e-70
NtNAC043	mRNA_134929_cds	gene_79412|	281	4-153	3	2	NtNAC-a	AT3G18400.1	ANAC058	281	4e-76
NtNAC044	mRNA_135411_cds	gene_79705|	286	8-156	3	2	NtNAC-c	AT4G28530.1	ANAC074	279	1e-75
NtNAC045	mRNA_135744_cds	gene_79904|	324	3-157	5	4	NtNAC-g	AT5G46590.1	ANAC096	293	9e-80
NtNAC046	mRNA_137342_cds	gene_80782|	322	15-169	3	2	NtNAC-b	AT5G61430.1	ANAC100, ATNAC5	343	1e-94
NtNAC047	mRNA_137627_cds	gene_80947|	364	5-157	3	2	NtNAC-d	AT2G18060.1	ANAC037	444	6e-125
NtNAC048	mRNA_138070_cds	gene_81202|	541	9-161; Transmembrane-517-540	6	5	NtNAC-i	AT3G10500.1	ANAC053	380	2e-105
NtNAC049	mRNA_138084_cds	gene_81211|	252	9-165	3	2	NtNAC-e	AT5G13180.1	ANAC083	270	5e-73
NtNAC050	mRNA_139327_cds	gene_81908|	633	18-172; Transmembrane-603-624	3	2	NtNAC-i	AT1G34190.1	ANAC017	382	6e-106
NtNAC051	mRNA_139748_cds	gene_82160|	389	28-176; Transmembrane-367-386	4	3	NtNAC-i	AT5G22290.1	ANAC089	248	3e-66
NtNAC052	mRNA_140409_cds	gene_82551|	307	3-151	3	2	NtNAC-a	AT3G18400.1	ANAC058	283	1e-76
NtNAC053	mRNA_141876_cds	gene_83417|	266	7-160	3	2	NtNAC-i	AT3G15500.1	ANAC055	103	1e-22
NtNAC054	mRNA_142782_cds	gene_83934|	397	11-175	3	2	NtNAC-d	AT2G46770.1	ANAC043	312	2e-85
NtNAC055	mRNA_143702_cds	gene_84483|	473	44-212	6	5	NtNAC-m	AT4G29230.1	ANAC075	472	2e-133
NtNAC056	mRNA_144307_cds	gene_84843|	300	4-156	3	2	NtNAC-d	AT1G71930.1	ANAC030, VND7	327	8e-90
NtNAC057	mRNA_15300_cds	gene_8673|	335	4-164	3	2	NtNAC-d	AT1G79580.3	ANAC033	300	1e-81
NtNAC058	mRNA_16420_cds	gene_9312|	195	5-163	3	2	NtNAC-j	AT5G64530.1	ANAC104, XND1	227	4e-60
NtNAC059	mRNA_16579_cds	gene_9401|	335	4-164	3	2	NtNAC-d	AT1G79580.3	ANAC033	310	9e-85
NtNAC060	mRNA_18215_cds	gene_10339|	345	21-172	3	2	NtNAC-a	AT5G18270.2	ANAC087	283	1e-76
NtNAC061	mRNA_19274_cds	gene_10958|	302	1-132	2	1	NtNAC-c	AT1G56010.2	ANAC021/22, AtNAC1	237	6e-63
NtNAC062	mRNA_19275_cds	gene_10959|	131	3-131	2	1	NtNAC-c	AT1G56010.2	ANAC021/22, AtNAC1	211	1e-55
NtNAC063	mRNA_21502_cds	gene_12251|	249	8-164	3	2	NtNAC-f	AT5G08790.1	ANAC081	309	1e-84
NtNAC064	mRNA_22310_cds	gene_12710|	321	15-169	3	2	NtNAC-b	AT5G61430.1	ANAC100, ATNAC5	348	3e-96
NtNAC065	mRNA_2279_cds	gene_1341|	228	14-187	3	2	NtNAC-m	AT2G33480.1	ANAC041	117	5e-27
NtNAC066	mRNA_23819_cds	gene_13637|	294	3-159	3	2	NtNAC-f	AT1G01720.1	ANAC002, ATAF1	394	3e-110
NtNAC067	mRNA_23854_cds	gene_13661|	332	9-177	3	2	NtNAC-d	AT2G46770.1	ANAC043	333	1e-91
NtNAC068	mRNA_24763_cds	gene_14200|	383	2-155	5	4	NtNAC-g	AT1G65910.1	ANAC028	391	5e-109
NtNAC069	mRNA_24888_cds	gene_14279|	269	11-169	3	2	NtNAC-e	AT1G61110.1	ANAC025	283	6e-77
NtNAC070	mRNA_25754_cds	gene_14790|	337	3-152	3	2	NtNAC-a	AT3G18400.1	ANAC058	292	3e-79
NtNAC071	mRNA_26081_cds	gene_14995|	344	3-156	4	3	NtNAC-g	AT4G17980.1	ANAC071	250	1e-66
NtNAC072	mRNA_26334_cds	gene_15155|	324	5-156	3	2	NtNAC-d	AT1G71930.1	ANAC030, VND7	300	6e-82
NtNAC073	mRNA_26873_cds	gene_15480|	298	4-159	3	2	NtNAC-f	AT1G01720.1	ANAC002, ATAF1	403	7e-113
NtNAC074	mRNA_2863_cds	gene_1644|	392	40-216	6	5	NtNAC-m	AT3G01600.1	ANAC044	286	1e-77
NtNAC075	mRNA_32158_cds	gene_18570|	288	9-157	3	2	NtNAC-c	AT4G28530.1	ANAC074	280	7e-76
NtNAC076	mRNA_32336_cds	gene_18678|	330	18-185	3	2	NtNAC-e	AT3G15510.1	ANAC056, AtNAC2	317	1e-86
NtNAC077	mRNA_32751_cds	gene_18904|	311	7-165	3	2	NtNAC-f	AT1G01720.1	ANAC002, ATAF1	331	5e-91
NtNAC078	mRNA_3340_cds	gene_1907|	628	4-156	5	4	NtNAC-g	AT1G65910.1	ANAC028	422	4e-118
NtNAC079	mRNA_33701_cds	gene_19489|	348	8-162	3	2	NtNAC-f	AT4G27410.2	ANAC072, RD26	372	1e-103
NtNAC080	mRNA_34016_cds	gene_19685|	280	7-162	3	2	NtNAC-f	AT1G69490.1	ANAC029, ATNAP, NAP	324	4e-89
NtNAC081	mRNA_34705_cds	gene_20085|	293	8-156	4	3	NtNAC-c	AT4G28530.1	ANAC074	273	7e-74
NtNAC082	mRNA_34924_cds	gene_20212|	329	5-156	3	2	NtNAC-d	AT1G12260.1	ANAC007, VND4	366	1e-101
NtNAC083	mRNA_36549_cds	gene_21129|	292	5-161	3	2	NtNAC-f	AT1G69490.1	ANAC029, ATNAP, NAP	309	1e-84
NtNAC084	mRNA_36607_cds	gene_21163|	390	12-172	3	2	NtNAC-h	AT1G26870.1	ANAC009	333	1e-91
NtNAC085	mRNA_3665_cds	gene_2099|	296	3-159	3	2	NtNAC-f	AT1G01720.1	ANAC002, ATAF1	382	2e-106
NtNAC086	mRNA_3778_cds	gene_2172|	183	5-152	2	1	NtNAC-d	AT4G10350.1	ANAC070	258	1e-69
NtNAC087	mRNA_38780_cds	gene_22396|	640	23-179; Transmembrane-614-636	6	5	NtNAC-k	AT3G49530.1	ANAC062	276	4e-74
NtNAC088	mRNA_39521_cds	gene_22789|	262	7-155	3	2	NtNAC-h	AT2G17040.1	ANAC036	249	1e-66
NtNAC089	mRNA_39854_cds	gene_22987|	496	31-182	4	3	NtNAC-o	AT5G61430.1	ANAC100, ATNAC5	99.4	6e-21
NtNAC090	mRNA_3998_cds	gene_2312|	327	7-160	3	2	NtNAC-a	AT2G24430.2	ANAC038, ANAC039	328	3e-90
NtNAC091	mRNA_40980_cds	gene_23702|	245	11-173	3	2	NtNAC-e	AT5G13180.1	ANAC083	222	2e-58
NtNAC092	mRNA_41178_cds	gene_23834|	645	24-178; Transmembrane-620-642	6	5	NtNAC-k	AT3G49530.1	ANAC062	261	1e-69
NtNAC093	mRNA_41368_cds	gene_23938|	194	5-162	3	2	NtNAC-j	AT5G64530.1	ANAC104, XND1	226	1e-59
NtNAC094	mRNA_42864_cds	gene_24797|	378	15-175	3	2	NtNAC-h	AT1G26870.1	ANAC009	319	2e-87
NtNAC095	mRNA_43877_cds	gene_25386|	410	39-186	3	2	NtNAC-h	AT2G02450.1	ANAC034/035	322	2e-88
NtNAC096	mRNA_44444_cds	gene_25714|	140	6-140	2	1	NtNAC-a	AT2G24430.2	ANAC038, ANAC039	243	3e-65
NtNAC097	mRNA_4548_cds	gene_2631|	305	57-222	3	2	NtNAC-m	AT4G28500.1	ANAC073	353	1e-97
NtNAC098	mRNA_47257_cds	gene_27367|	361	10-169	3	2	NtNAC-f	AT4G27410.2	ANAC072, RD26	356	2e-98
NtNAC099	mRNA_48358_cds	gene_28032|	325	12-166	3	2	NtNAC-b	AT5G61430.1	ANAC100, ATNAC5	321	5e-88
NtNAC100	mRNA_50520_cds	gene_29290|	243	4-157	3	2	NtNAC-g	AT3G17730.1	ANAC057	362	1e-100
NtNAC101	mRNA_50956_cds	gene_29539|	296	13-166	3	2	NtNAC-b	AT5G61430.1	ANAC100, ATNAC5	343	7e-95
NtNAC102	mRNA_5136_cds	gene_2947|	215	1-131	2	1	NtNAC-h	AT2G17040.1	ANAC036	179	2e-45
NtNAC103	mRNA_5138_cds	gene_2949|	315	1-129	3	2	NtNAC-a	AT5G18270.2	ANAC087	236	1e-62
NtNAC104	mRNA_52282_cds	gene_30314|	158	123-139	1	0	NtNAC-o	no found
NtNAC105	mRNA_54153_cds	gene_31377|	483	1-95	5	4	NtNAC-g	AT1G65910.1	ANAC028	297	1e-80
NtNAC106	mRNA_54603_cds	gene_31679|	329	2-153	3	2	NtNAC-b	AT5G61430.1	ANAC100, ATNAC5	366	1e-101
NtNAC107	mRNA_54767_cds	gene_31772|	456	46-212	6	5	NtNAC-m	AT4G29230.1	ANAC075	456	1e-128
NtNAC108	mRNA_5510_cds	gene_3155|	329	5-156	3	2	NtNAC-d	AT1G12260.1	ANAC007, VND4	364	5e-101
NtNAC109	mRNA_5553_cds	gene_3186|	289	6-154	3	2	NtNAC-a	AT3G18400.1	ANAC058	258	4e-69
NtNAC110	mRNA_55712_cds	gene_32310|	262	5-158	4	3	NtNAC-f	AT1G69490.1	ANAC029, ATNAP, NAP	244	6e-65
NtNAC111	mRNA_55948_cds	gene_32441|	284	47-211	3	2	NtNAC-m	AT4G28500.1	ANAC073	300	7e-82
NtNAC112	mRNA_56478_cds	gene_32785|	194	6-153	3	2	NtNAC-j	AT5G64530.1	ANAC104, XND1	129	1e-30
NtNAC113	mRNA_56483_cds	gene_32788|	349	5-156	3	2	NtNAC-d	AT1G12260.1	ANAC007, VND4	305	4e-83
NtNAC114	mRNA_57177_cds	gene_33191|	279	7-160	3	2	NtNAC-i	AT1G52890.1	ANAC019	110	1e-24
NtNAC115	mRNA_57217_cds	gene_33217|	304	56-221	3	2	NtNAC-m	AT4G28500.1	ANAC073	316	1e-86
NtNAC116	mRNA_57833_cds	gene_33570|	441	42-214	6	5	NtNAC-m	AT1G25580.1	ANAC008	491	3e-139
NtNAC117	mRNA_62582_cds	gene_36236|	325	12-166	3	2	NtNAC-b	AT5G61430.1	ANAC100, ATNAC5	357	6e-99
NtNAC118	mRNA_6276_cds	gene_3562|	375	11-168	3	2	NtNAC-d	AT2G18060.1	ANAC037	412	2e-115
NtNAC119	mRNA_63700_cds	gene_36854|	260	1-148	1	0	NtNAC-o	AT5G13180.1	ANAC083	71.6	5e-13
NtNAC120	mRNA_6445_cds	gene_3656|	338	3-151	3	2	NtNAC-a	AT3G18400.1	ANAC058	291	4e-79
NtNAC121	mRNA_6606_cds	gene_3741|	346	5-157	3	2	NtNAC-d	AT1G12260.1	ANAC007, VND4	319	2e-87
NtNAC122	mRNA_66877_cds	gene_38717|	266	1-150	1	0	NtNAC-o	AT2G33480.1	ANAC041	70.5	1e-12
NtNAC123	mRNA_68166_cds	gene_39437|	302	1-56	4	3	NtNAC-m	AT4G29230.1	ANAC075	147	7e-36
NtNAC124	mRNA_70298_cds	gene_40682|	450	46-212	6	5	NtNAC-m	AT4G29230.1	ANAC075	462	2e-130
NtNAC125	mRNA_70311_cds	gene_40689|	379	15-174	3	2	NtNAC-h	AT1G26870.1	ANAC009	315	4e-86
NtNAC126	mRNA_70561_cds	gene_40836|	329	19-185	3	2	NtNAC-e	AT3G15510.1	ANAC056, AtNAC2	326	1e-89
NtNAC127	mRNA_70860_cds	gene_41014|	177	1-46	2	1	NtNAC-c	AT4G28530.1	ANAC074	96.7	8e-21
NtNAC128	mRNA_71355_cds	gene_41279|	220	1-48	2	1	NtNAC-d	AT1G71930.1	ANAC030, VND7	132	2e-31
NtNAC129	mRNA_72043_cds	gene_41669|	383	11-173	3	2	NtNAC-h	AT1G26870.1	ANAC009	310	1e-84
NtNAC130	mRNA_72197_cds	gene_41746|	249	9-164	3	2	NtNAC-e	AT5G13180.1	ANAC083	267	4e-72
NtNAC131	mRNA_73606_cds	gene_42537|	226	8-161	3	2	NtNAC-a	AT2G24430.2	ANAC038, ANAC039	298	3e-81
NtNAC132	mRNA_74613_cds	gene_43128|	619	19-172; Transmembrane-589-613	3	2	NtNAC-i	AT1G34190.1	ANAC017	369	3e-102
NtNAC133	mRNA_75504_cds	gene_43698|	130	21-130	2	1	NtNAC-i	AT1G34180.1	ANAC016	147	2e-36
NtNAC134	mRNA_79124_cds	gene_45895|	280	25-182	4	3	NtNAC-i	AT3G10480.2	ANAC050	293	6e-80
NtNAC135	mRNA_79402_cds	gene_46093|	493	31-176	4	3	NtNAC-o	AT1G69490.1	ANAC029, ATNAP, NAP	95.1	9e-20
NtNAC136	mRNA_80414_cds	gene_46748|	353	9-176	3	2	NtNAC-e	AT3G15510.1	ANAC056, AtNAC2	322	2e-88
NtNAC137	mRNA_83887_cds	gene_49016|	290	9-155	3	2	NtNAC-m	AT4G28500.1	ANAC073	312	2e-85
NtNAC138	mRNA_85241_cds	gene_49846|	290	53-217	3	2	NtNAC-h	AT2G17040.1	ANAC036	290	9e-79
NtNAC139	mRNA_8529_cds	gene_4782|	440	46-218	6	5	NtNAC-m	AT1G25580.1	ANAC008	480	7e-136
NtNAC140	mRNA_86949_cds	gene_50910|	226	15-185	3	2	NtNAC-m	AT2G33480.1	ANAC041	109	2e-24
NtNAC141	mRNA_88437_cds	gene_51852|	351	8-171	3	2	NtNAC-d	AT2G46770.1	ANAC043	301	3e-82
NtNAC142	mRNA_88928_cds	gene_52148|	299	14-163	3	2	NtNAC-d	AT4G10350.1	ANAC070	293	1e-79
NtNAC143	mRNA_89147_cds	gene_52295|	138	7-138	2	1	NtNAC-d	AT4G36160.1	ANAC076	266	3e-72
NtNAC144	mRNA_91311_cds	gene_53696|	296	8-156	4	3	NtNAC-c	AT4G28530.1	ANAC074	273	1e-73
NtNAC145	mRNA_92346_cds	gene_54436|	242	4-157	3	2	NtNAC-g	AT3G17730.1	ANAC057	373	6e-104
NtNAC146	mRNA_93837_cds	gene_55408|	310	23-188	3	2	NtNAC-h	AT2G43000.1	ANAC042	267	7e-72
NtNAC147	mRNA_93856_cds	gene_55415|	421	39-186; Transmembrane-377-398	4	3	NtNAC-i	AT3G44290.1	ANAC060	259	2e-69
NtNAC148	mRNA_96726_cds	gene_57286|	326	14-168	3	2	NtNAC-b	AT5G61430.1	ANAC100, ATNAC5	354	4e-98
NtNAC149	mRNA_96803_cds	gene_57335|	329	16-171	3	2	NtNAC-b	AT5G61430.1	ANAC100, ATNAC5	350	1e-96
NtNAC150	mRNA_97992_cds	gene_58037|	334	12-166	3	2	NtNAC-a	AT5G53950.1	ANAC098, CUC2	313	9e-86
NtNAC151	mRNA_98375_cds	gene_58292|	408	42-189	3	2	NtNAC-h	AT2G02450.1	ANAC034/035	320	1e-87
NtNAC152	mRNA_9881_cds	gene_5585|	421	36-183; Transmembrane-377-398	4	3	NtNAC-i	AT3G44290.1	ANAC060	253	1e-67
NtNAC153	mRNA_98928_cds	gene_58628|	300	4-159	3	2	NtNAC-f	AT1G01720.1	ANAC002, ATAF1	395	1e-110
NtNAC154	mRNA_9936_cds	gene_5623|	229	3-163	3	2	NtNAC-h	AT5G22380.1	ANAC090	253	9e-68
