# Supplementary material for: NAC Family Transcription Factors in Tobacco and Their Potential Role in Regulating Leaf Senescence
Source: Front Plant Sci. 2018 Dec 21;9:1900. doi: 10.3389/fpls.2018.01900 (PMC6308388; doi:10.3389/fpls.2018.01900)
Supplement: TABLE S5 — Expression change ratio of ANAC genes between senescent leaves and non-senescing leaves. [file Table_5.xlsx]

## Sheet: Sheet1
Supplementary Table S5 Expression change ratio of ANAC genes between senescent leaves and non-senescing leaves.
Gene name		Gene symbol	Fold change
At1g01010-TIGR-G		ANAC001	2.38615
At1g01720-TIGR-G		ANAC002	5.90457
At1g02220-TIGR-G		ANAC003	5.45852
AT1G02230.1		ANAC004	nd
At1g02250-TIGR-G		ANAC005	1.23932
At1g03490-TIGR-G		ANAC006	1.01418
At1g12260-TIGR-G		ANAC007	0.0791927
At1g25580-TIGR-G		ANAC008	1.91984
At1g26870-TIGR-G		ANAC009	0.703638
At1g28470-TIGR-G		ANAC010	0.780345
AT1G32510.1		ANAC011	nd
At1g32770-TIGR-G		ANAC012	1.15531
At1g32870-TIGR-G		ANAC013	1.82307
At1g33060-TIGR-G		ANAC014	2.04171
At1g33280-TIGR-G		ANAC015	2.43527
At1g34180-TIGR-G		ANAC016	5.02507
At1g34190-TIGR-G		ANAC017	1.97931
At1g52880-TIGR-G		ANAC018	6.48932
At1g52890-TIGR-G		ANAC019	26.2367
At1g54330-TIGR-G		ANAC020	1.43345
At1g56010-TIGR-G		ANAC021	9.23998
At1g60240-TIGR-G		ANAC022	4.12463
At1g60280-TIGR-G		ANAC023	1.30512
At1g60350-TIGR-G		ANAC024	0.757953
At1g61110-TIGR-G		ANAC025	0.909677
At1g62700-TIGR-G		ANAC026	0.966505
At1g64105-TIGR-G		ANAC027	1.05137
At1g65910-TIGR-G		ANAC028	0.494298
At1g69490-TIGR-G		ANAC029	93.6364
At1g71930-TIGR-G		ANAC030	0.405099
At1g76420-TIGR-G		ANAC031	0.637285
At1g77450-TIGR-G		ANAC032	7.10371
At1g79580-TIGR-G		ANAC033	0.946819
At2g02450-TIGR-G		ANAC034,35	0.392941
At2g17040-TIGR-G		ANAC036	1.67515
At2g18060-TIGR-G		ANAC037	1.09852
At2g24430-TIGR-G		ANAC038,39	0.861099
At2g27300-TIGR-G		ANAC040	0.285465
At2g33480-TIGR-G		ANAC041	5.21328
At2g43000-TIGR-G		ANAC042	6.47868
At2g46770-TIGR-G		ANAC043	0.578376
AT3G01600.1		ANAC044
At3g03200-TIGR-G		ANAC045	0.621299
At3g04060-TIGR-G		ANAC046	11.2294
At3g04070-TIGR-G		ANAC047	32.1611
At3g04420-TIGR-G		ANAC048	2.34223
AT3G04430.1		ANAC049	nd
AT3G10480.1		ANAC050	nd
AT3G10490.1		ANAC051,52	nd
At3g10500-TIGR-G		ANAC053	4.28177
At3g15170-TIGR-G		ANAC054	2.24888
At3g15500-TIGR-G		ANAC055	18.8029
At3g15510-TIGR-G		ANAC056	3.82676
At3g17730-TIGR-G		ANAC057	0.421018
At3g18400-TIGR-G		ANAC058	0.811453
At3g29035-TIGR-G		ANAC059	9.7471
AT3G44290.1		ANAC060	nd
At3g44350-TIGR-G		ANAC061	1.05821
At3g49530-TIGR-G		ANAC062	0.987236
AT3G55210.1		ANAC063	nd
AT3G56530.1		ANAC064	nd
AT3G56560.1		ANAC065	nd
At3g61910-TIGR-G		ANAC066	0.924225
AT4G01520.1		ANAC067	nd
AT4G01540.1		ANAC068	nd
At4g01550-TIGR-G		ANAC069	2.60511
At4g10350-TIGR-G		ANAC070	0.675277
At4g17980-TIGR-G		ANAC071	0.889623
At4g27410-TIGR-G		ANAC072	3.47022
At4g28500-TIGR-G		ANAC073	1.17498
At4g28530-TIGR-G		ANAC074	1.17865
At4g29230-TIGR-G		ANAC075	7.98474
At4g36160-TIGR-G		ANAC076	0.66099
At5g04400-TIGR-G		ANAC077	0.541859
At5g04410-TIGR-G		ANAC078	2.16493
At5g07680-TIGR-G		ANAC079,80	2.98259
AT5G08790.1		ANAC081	nd
At5g09330-TIGR-G		ANAC082	1.91117
At5g13180-TIGR-G		ANAC083, VNI2	4.43016
At5g14000-TIGR-G		ANAC084	23.6396
AT5G14490.1		ANAC085	nd
At5g17260-TIGR-G		ANAC086	0.42359
At5g18270-TIGR-G		ANAC087	3.59499
AT5G18300.1		ANAC088
At5g22290-TIGR-G		ANAC089	6.61347
At5g22380-TIGR-G		ANAC090	1.03426
At5g24590-TIGR-G		ANAC091	0.958547
At5g39610-TIGR-G		ORE1, ANAC092	43.9204
AT5G39690.1		ANAC093	nd
At5g39820-TIGR-G		ANAC094	0.360803
At5g41090-TIGR-G		ANAC095	1.85167
At5g46590-TIGR-G		ANAC096	1.60579
At5g50820-TIGR-G		ANAC097	0.889858
At5g53950-TIGR-G		ANAC098	0.714759
At5g56620-TIGR-G		ANAC099	1.22704
At5g61430-TIGR-G		ANAC100	4.43281
At5g62380-TIGR-G		ANAC101	0.384744
At5g63790-TIGR-G		ANAC102	3.24389
At5g64060-TIGR-G		ANAC103	0.325402
At5g64530-TIGR-G		ANAC104, XND1	4.52475
At5g66300-TIGR-G		ANAC105	0.490515
The fold of change was based on the background signal of non-senescing leaves.
nd is no detected.
